1 **TITLE: Titin-Truncating variants Predispose to Dilated Cardiomyopathy in Diverse**  
2 **Populations**

3  
4  
5 **Authors:** John DePaolo, MD, PhD,<sup>1</sup> Marc Bornstein, AB,<sup>2</sup> Renae Judy, MS,<sup>1</sup> Sarah  
6 Abramowitz, BA,<sup>1</sup> Shefali S. Verma, PhD,<sup>3</sup> Michael G. Levin, MD,<sup>2,4</sup> Zoltan Arany, MD,  
7 PhD,<sup>2\*</sup> Scott M. Damrauer, MD,<sup>1,2,4,5\*</sup>

8  
9 **Affiliations:**

10 <sup>1</sup> Department of Surgery, Perelman School of Medicine, University of Pennsylvania,  
11 Philadelphia, PA 19104, USA.

12 <sup>2</sup> Cardiovascular Institute, Department of Medicine, Perelman School of Medicine,  
13 University of Pennsylvania, PA 19104, USA.

14 <sup>3</sup> Department of Pathology and Laboratory Medicine, Perelman School of Medicine,  
15 University of Pennsylvania, PA 19104, USA.

16 <sup>4</sup> Corporal Michael J. Crescenz VA Medical Center, Philadelphia, PA 19104, USA.

17 <sup>5</sup> Department of Genetics, Perelman School of Medicine, University of Pennsylvania,  
18 Philadelphia, PA 19104, USA.

19 \* Jointly supervised this work

20  
21 **Text Word Count:** 2704

22 **References:** 25

23 **Tables:** 1

24 **Figures:** 3

25  
26  
27 **Address for correspondence:**

28 Scott Damrauer, MD

29 Perelman School of Medicine

30 Division of Vascular Surgery

31 Hospital of the University of Pennsylvania

32 3400 Spruce Street, 14th Floor South Perelman Center

33 Philadelphia, PA 19104

34 Office: 215-615-1698

35 [scott.damrauer@penmedicine.upenn.edu](mailto:scott.damrauer@penmedicine.upenn.edu)

36

37 **Key Points**

38 **Question:** Do high percentage spliced in (hiPSI) titin truncating variants (TTNtvs) confer  
39 similar levels of risk for dilated cardiomyopathy (DCM) across diverse populations?

40 **Findings:** In a cohort study that comprised 43,731 individuals of diverse genetic  
41 background with electronic health records linked to whole exome sequencing data,  
42 hiPSI TTNtvs conferred increased risk of DCM across all individuals irrespective of  
43 genetic background as measured by genetic distance from the 1000 Genomes Project  
44 European centroid.

45 **Meaning:** The findings of this study suggest that TTNtvs increase risk of DCM among  
46 individuals independent of genetic background and that genetic similarity to a reference  
47 population should not play a role in screening for genetic causes of dilated  
48 cardiomyopathy.

49

50 **Abstract**

51 **Importance:** The effect of high percentage spliced in (hiPSI) *TTN* truncating variants  
52 (TTNtvs) on risk of dilated cardiomyopathy (DCM) has historically been studied among  
53 population subgroups defined by genetic similarity to European reference populations.  
54 This has raised questions about the effect of TTNtvs in diverse populations, especially  
55 among individuals genetically similar to African reference populations.

56 **Objective:** To determine the effect of TTNtvs on risk of DCM in diverse population as  
57 measured by genetic distance (GD) in principal component (PC) space.

58 **Design:** Cohort study

59 **Setting:** Penn Medicine Biobank (PMBB) is a large, diverse biobank.

60 **Participants:** Participants were recruited from across the Penn Medicine healthcare  
61 system and volunteered to have their electronic health records linked to biospecimen  
62 data including DNA which has undergone whole exome sequencing.

63 **Main Outcomes and Measures:** Risk of DCM among individuals carrying a hiPSI  
64 TTNtv.

65 **Results:** Carrying a hiPSI TTNtv was associated with DCM among PMBB participants  
66 across a range of GD deciles from the 1000G European centroid; the effect estimates  
67 ranged from odds ratio (OR) = 3.29 (95% confidence interval [CI] 1.26 to 8.56) to OR =  
68 9.39 (95% CI 3.82 to 23.13). When individuals were assigned to population subgroups  
69 based on genetic similarity to the 1000G reference populations, hiPSI TTNtvs conferred

70 significant risk of DCM among those genetically similar to the 1000G European  
71 reference population (OR = 7.55, 95% CI 4.99 to 11.42,  $P < 0.001$ ) and individuals  
72 genetically similar to the 1000G African reference population (OR 3.50, 95% CI 1.48 to  
73 8.24,  $P = 0.004$ ).

74 **Conclusions and Relevance:** TTNtvs are associated with increased risk of DCM  
75 among a diverse cohort. There is no significant difference in effect of TTNtvs on DCM  
76 risk across deciles of GD from the 1000G European centroid, suggesting genetic  
77 background should not be considered when screening individuals for titin-related DCM.

78

## 79 Introduction

80 Titin, the protein encoded by the *TTN* gene, is the largest protein in the human  
81 body. It is found in the sarcomere where it spans from the Z-disk to the M-band, and is  
82 critical for sarcomere assembly, contraction and relaxation in striated cardiac muscle.<sup>1</sup>  
83 In populations largely composed of individuals genetically similar to the 1000 Genomes  
84 Project (1000G) European reference population (EUR), heterozygous *TTN* truncating  
85 variants (TTNtvs) that encode for shortened forms of the titin protein have been  
86 identified as a common genetic cause of dilated cardiomyopathy (DCM). These TTNtv  
87 have been associated with 25% of familial cases of DCM, and 10-20% of sporadic  
88 cases.<sup>2-7</sup> Only variants located in exons that are highly likely to be spliced into adult  
89 cardiac *TTN* transcripts, known as high percentage spliced in (hiPSI) variants, are  
90 pathogenic.<sup>3</sup> hiPSI TTNtvs may cause DCM by reducing abundance of full-length TTN  
91 protein (haploinsufficiency) and/or through dominant negative effects.<sup>8,9</sup>

92 We previously demonstrated the association of hiPSI TTNtvs with DCM  
93 exclusively in EUR individuals, but were unable to detect an association between hiPSI  
94 TTNtvs and DCM among Penn Medicine Biobank (PMBB) participants genetically  
95 similar to the 1000G African reference population (AFR; odds ratio [OR] 1.8, 95% CI 0.2  
96 to 13.7,  $P=0.57$ ), or among AFR participants of the Jackson Heart Study.<sup>7</sup> Recently, a  
97 cross-sectional analysis of individuals with DCM demonstrated a statistically significant  
98 but attenuated effect of predicted loss-of-function (pLOF) variants in *TTN* among AFR  
99 individuals compared to EUR individuals, potentially underscoring the limitations of  
100 applying genetic understanding of disease derived from a single ancestry group to  
101 diverse populations.<sup>10</sup>

102 Common and rare genetic risk factors for disease have historically been  
103 analyzed among different populations separated by ancestry.<sup>11-14</sup> This reflects the belief  
104 that the artificial grouping of individuals into genetically common cohorts allows  
105 improved assignment of genetic risk. However, greater understanding of genetic  
106 similarities between groups of individuals combined with the results of genetic admixture  
107 within different populations suggests that instead of strict dichotomization into groups,  
108 genetic ancestry is better thought of as a continuum of relative similarity.<sup>12</sup>

109 Here we describe the assessment of DCM risk conferred by hiPSI TTNtvs in a  
110 large, diverse biobank. Instead of using genetic similarity to group individuals together,  
111 each participant's genetic distance (GD) from the 1000G European centroid was  
112 calculated and risk of DCM was assessed across a range of genetic distances. As a  
113 sensitivity analysis, participants were assigned an "population group" according to their  
114 genetic similarity to one of the 1000G continental-level reference populations and risk of  
115 DCM was stratified by "genetic similar" group. Due to previous research identifying  
116 TTNtvs risk factors for atrial fibrillation (Afib),<sup>15-17</sup> we performed a similar investigation  
117 into the link between TTNtvs and Afib.

118

## 119 **Methods**

### 120 *Study Population*

121 The Penn Medicine BioBank is a genomic and precision medicine cohort  
122 comprising participants who receive care in the Penn Medicine health system and who  
123 consent to linkage of electronic health records with biospecimens, including 43,731 with  
124 DNA which has undergone whole exome sequencing ([pmbb.med.upenn.edu](http://pmbb.med.upenn.edu)). As

125 previously described,<sup>7</sup> DCM was defined either as  $\geq 2$  outpatient or  $\geq 1$  inpatient  
126 encounters with: 1) the *International Classification of Diseases, 10<sup>th</sup> Revision* (ICD10)  
127 diagnosis code of I42.0; or 2) ICD10 codes I42.8 or I42.9 or the *International*  
128 *Classification of Diseases, Ninth Revision* (ICD9) codes 425.4, 425.8, or 425.9, and  
129 mention of “dilated cardiomyopathy” or “DCM” in free text encounter notes. Ischemic  
130 cardiomyopathy (ICM) was defined as  $\geq 2$  outpatient or  $\geq 1$  inpatient encounters with  
131 ICD10 codes I24 or I25, or ICD9 codes 411 or 414. Afib was defined as  $\geq 2$  outpatient or  
132  $\geq 1$  inpatient encounters with ICD10 codes I48, I48.1, I48.2, or I48.9, or ICD9 codes  
133 427.2 or 427.21. A total of 9,020 individuals in PMBB had transthoracic  
134 echocardiography (TTE) data available that included left ventricular ejection fraction  
135 (LVEF).

### 136 *Genetic Data*

137 Whole exome sequencing was performed as previously described by Regeneron  
138 Genomics Center.<sup>18</sup> Individual patient DNA samples were processed and sequenced on  
139 the Illumina NovaSeq 6000 (Albany, NY, USA). WeCall variant caller (v2.0.0) was  
140 employed for sequence alignment (GRCh38), variant identification, and genotype  
141 assignment. Quality control exclusions included sex errors, high rates of heterozygosity  
142 (D-statistic  $> 0.4$ ), low sequence coverage, and genetically identified sample duplicates.  
143 Single nucleotide variants (SNVs) were filtered for a read depth  $\geq 7$  and were retained if  
144 they either had at least one heterozygous variant genotype with an allele balance ratio  
145  $\geq 0.15$ , or a homozygous variant genotype.<sup>19</sup> Insertion-deletion variants (INDELs) were  
146 filtered for a read depth  $\geq 10$  and either a heterozygous variant genotype with an allele  
147 balance  $\geq 0.20$ , or a homozygous variant genotype.

## 148 *TTN Truncating Variant Calls*

149 TTNtvs were filtered for minor allele frequency < 0.001 and selected based on  
150 predicted loss of function, truncating variants using ANNOVAR.<sup>20</sup> Splice site variants  
151 were screened for those affecting canonical donor or acceptor splice sites (two bases  
152 flanking either exon). Variants were considered hiPSI if percent spliced in was greater  
153 than 90% (PSI>0.9).<sup>3</sup>

## 154 *Genetic Distance*

155 To consider differences in genetic ancestry along a continuous scale, genetic  
156 distance (GD) from the 1000G European centroid was calculated as previously  
157 described.<sup>14</sup> Briefly, the 43,731 individuals in the PMBB were projected onto the 1000G<sup>21</sup>  
158 principal component (PC) space. The GD was calculated by taking the Euclidean  
159 distance for each individual from the 1000G European centroid using the equation

$$160 \quad d_i = \sqrt{\sum_{j=1}^{J=10} (pc_{ij} - pc_{Ej})^2}$$

where  $pc_{ij}$  is the  $j$ th PC of individual  $i$ ,  $pc_{Ej}$  is the 1000G

161 European mean of the  $j$ th PC, and  $J$  is set to 10. GD was used to bin each individual in  
162 PMBB into deciles from the closest 10% to the European centroid to the furthest 10%  
163 from the European centroid.

## 164 *Statistical Analysis*

165 Logistic regression was employed to evaluate the association of hiPSI TTNtvs  
166 with prevalent DCM adjusting for age and sex. Linear regression was used to assess  
167 the effect of hiPSI TTNtvs on minimum left ventricular ejection fraction (LVEF) adjusting  
168 for age and sex. Statistical analyses were performed using R (version 4.2.0).

169

170



171 **Results**

172 *Study Population*

173 There were 43,371 participants in the analytic cohort (**Table 1**). The median age  
174 at analysis was 57 years (IQR: 45-69 years) and 21,907 (50%) were female. One  
175 percent (436 individuals) carried a hiPSI TTNtv, 1,112 individuals (2.5%) had a DCM  
176 diagnosis, and 4,920 individuals (11%) had an Afib diagnosis. There were 365 unique  
177 TTNtvs identified including 174 stop-gains, 44 frameshifting insertion-deletions, and 147  
178 essential splice site variants.

179 *Calculating genetic distance*

180 GD as the calculated Euclidean distance provides a method to assess the risk of  
181 DCM conferred by TTNtvs across a genetically diverse population without relying on  
182 artificial grouping based on genetic similarity to a reference panel. Euclidean distance is  
183 the distance between two points in  $n^{\text{th}}$ -dimensional space. The vast majority of  
184 understanding of the genetic risk of DCM, including that conferred by TTNtvs, was  
185 derived from investigation of cohorts primarily comprised of individuals genetically  
186 similar to the 1000G European reference population. Integrating the genetic distance  
187 from the 1000G European centroid into the analysis of DCM risk among TTNtv carriers  
188 accounts for population differences between individuals and the cohort from which  
189 genetic understanding of disease has been derived. Therefore, GD provides two useful  
190 tools in the current analysis: 1) a method to treat genetic similarity as a continuum  
191 rather than an artificially dichotomized value; and 2) a way to test if decreasing genetic  
192 similarity indicates a change in TTNtv-derived DCM risk that might support previous  
193 findings of differing effects among genetically dissimilar groups.

194 GD was calculated for each individual in PMBB and genetic diversity by GD was  
195 compared to categorical assignment to population subgroups similar to the 1000G  
196 reference populations based on PC analysis (**Figure 1A-D**). To demonstrate the extent  
197 of genetic admixture and the arbitrary nature of grouping individuals genetically similar  
198 to reference populations, PMBB individuals were compared to 1000G reference panel  
199 individuals based on PC analysis (**Figure 1E-G**). Individuals were then binned by GD  
200 decile; each decile included a range of individuals genetically similar to a 1000G  
201 reference population (**Supplemental Table 1**) and PC analysis by GD decile  
202 redemonstrated the extent of genetic admixture (**Supplemental Figure 1**). Together  
203 these analyses characterize the genetic heterogeneity in the PMBB population.

204

#### 205 *Effect of TTNtvS on risk of DCM across genetic distances*

206 In the population overall, there is a 5.6-fold increased risk of DCM conferred by  
207 carrying a TTNtv when adjusting for age, sex, and the first five genetic PCs  
208 [**Supplemental Table 2**]. To determine the effect of TTNtvS on DCM risk at different  
209 GDs from the European centroid, logistic regression analysis was performed among  
210 PMBB individuals binned by GD decile adjusting for age and sex within each bin.  
211 Among those individuals closest to the 1000G European centroid by GD, hiPSI TTNtvS  
212 were associated with DCM (Decile 1 OR = 5.82, 95% CI 2.42 to 14.01,  $P < 0.001$ )  
213 [**Figure 2A**]; there was no significant effect decomposition as GD decile increased  
214 (Decile 10 OR = 9.39, 95% CI 3.82 to 23.13,  $P < 0.001$ ). Meta-analysis of binned  
215 results demonstrated an overall OR = 5.42 (95% CI 4.01 to 7.32,  $P < 0.001$ ); there  
216 was no evidence of significant heterogeneity ( $I^2 = 0\%$ ,  $\chi^2 = 4.59$ ,  $P = 0.87$ ). This was

217 supported by a second analysis among all participants in which either GD from the  
218 1000G European centroid alone nor the interaction between GD and hiPSI TTNtvs had  
219 a statistically significant effect on the risk of DCM (**Supplemental Table 2**). Taken  
220 together these results suggest that GD does not alter DCM risk. Similarly, there was no  
221 evident trend of greater or lesser effect on minimum LVEF as GD increased (**Figure**  
222 **2B**), though there was a trend towards increased heterogeneity ( $I^2=42\%$ ,  $\chi^2=15.48$ ,  
223  $P=0.08$ ). We conclude that hiPSI TTNtvs associate with increased DCM risk and  
224 reduced minimum LVEF across diverse populations.

225

#### 226 *Comparison to categorical assignment of genetic diversity*

227 We previously demonstrated a significant effect on DCM risk conferred by  
228 carrying TTNtvs among individuals genetically similar to the 1000G EUR reference  
229 population, however could not detect an effect among individuals genetically similar to  
230 the 1000G AFR reference population.<sup>7</sup> In this updated study, encompassing a  
231 substantially larger number of participants, we evaluated the effect of TTNtvs among  
232 individuals artificially separated into groups to compare both to our previous published  
233 results and to the results above. Carrying a hiPSI TTNtv was associated with DCM  
234 among individuals genetically similar to the 1000G EUR reference population, whether  
235 including (**Supplemental Figure 2**) or excluding individuals with ischemic  
236 cardiomyopathy [ICM] (odds ratio [OR] 7.55, 95% CI 4.99 to 11.42,  $P<0.001$ ) [**Figure**  
237 **3A**]. Similar, but attenuated, results were observed among individuals genetically similar  
238 to the 1000G AFR reference population (OR 3.50, 95% CI 1.48 to 8.24,  $P=0.004$ ).  
239 Linear regression analysis demonstrated a consistent effect on minimum LVEF

240 conferred by carrying a TTNtv without attenuation in the AFR population group **[Figure**  
241 **3B]**. We conclude that when individuals are artificially grouped by genetic similarity to a  
242 reference population, hiPSI TTNtvs continue to associate with a diagnosis of DCM and  
243 negatively associate with decreased minimum LVEF across diverse groups.

244

#### 245 *Effect of titin truncating variants on risk of atrial fibrillation*

246 To test the effect of TTNtvs on risk of Afib, another cardiovascular diagnosis  
247 previously shown to associate with TTNtvs, we used logistic regression analysis by GD  
248 and by genetically similar group. Among those individuals closest to the 1000G  
249 European centroid by GD, hiPSI TTNtvs were associated with Afib (Decile 1 OR = 2.68,  
250 95% CI 1.40 to 5.16,  $P=0.003$ ) **[Supplemental Figure 3A]**. While there was increased  
251 variability across deciles (deciles 2,4, and 5 had statistically insignificant associations  
252 between hiPSI TTNtvs and Afib,  $I^2=40\%$ ,  $\chi^2=14.96$ ,  $P=0.09$ ), there was no significant  
253 trend in effect as GD from the 1000G European centroid increased (Decile 10 OR =  
254 4.36, 95% CI 2.21 to 8.61,  $P<0.001$ ). When PMBB individuals were grouped by genetic  
255 similarity to a reference population, the effect estimate among individuals genetically  
256 similar to the 1000G EUR reference population (OR = 2.11, 95% CI 1.62 to 2.77,  
257  $P<0.001$ ) was similar to the effect estimate among individuals genetically similar to the  
258 1000G AFR reference population (OR = 1.98, 95% CI 1.02 to 3.85,  $P=0.04$ )  
259 **[Supplemental Figure 3B]**. We conclude that TTNtvs associate with increased risk of  
260 Afib across diverse populations.

261

262

263 **Discussion**

264           Using continuous genetic distance as an alternative method to investigate the  
265 effect of genetic similarity on rare variant cardiovascular disease risk, we demonstrated  
266 that hiPSI TTNtvs associated with increased risk of DCM and reduced minimum LVEF  
267 across diverse populations. These results were supported when individuals were  
268 artificially dichotomized by genetic similarity to reference populations, although the  
269 effect estimate among individuals genetically similar to the AFR reference population  
270 may be attenuated. We also demonstrated a consistent though less robust effect of  
271 hiPSI TTNtvs on risk of Afib across diverse populations.

272           Although genetic epidemiology studies have historically relied on arbitrary cutoffs  
273 to differentiate and label populations of similar ancestry, genetic ancestry is more  
274 appropriately considered as a continuum due to the degree of admixture even among  
275 similar populations.<sup>22-24</sup> The question of TTNtv effect among individuals genetically  
276 similar to the 1000G AFR reference population provided an opportunity to reassess the  
277 role ancestry plays in how we approach individual risk in cardiovascular disease. The  
278 homogeneity of effect of TTNtvs across deciles of GD from the 1000G European  
279 centroid removes barriers constructed by presenting results separated by artificially  
280 constructed population subgroups, such as within group variation and small sample  
281 size. Future evaluation of monogenic risk of cardiovascular disease may benefit from  
282 utilizing a similar approach, which may be more broadly applicable than analyses using  
283 genetically similar group dichotomization alone.

284           These results refine our previous findings that hiPSI TTNtvs are associated with  
285 DCM among individuals genetically similar to EUR reference populations in PMBB.

286 Previously, we reported an OR of 18.7 (95% CI 9.1 to 39.4) for DCM among EUR  
287 individuals with hiPSI TTNtvs.<sup>7</sup> The range of effect estimates in our analysis of risk by  
288 GD from the 1000G European centroid was OR 3.3 (95% CI 1.3 to 8.6) to OR 9.4 (95%  
289 CI 3.8 to 23.1), and the effect estimate for individuals genetically similar to EUR  
290 reference panels was contained within that range (OR 7.6, 95% CI 5.0 to 11.4,  
291  $P<0.001$ ). The attenuation of effect we observed between our initial publication and the  
292 present study may reflect a winner's curse in our initial study, where the initially-reported  
293 effect size tends to be over-estimated in genetic association studies.<sup>25</sup> However, the  
294 makeup of PMBB has also changed substantially in the past five years such that it is  
295 less enriched for cardiovascular disease (6.2% prevalence of DCM previously  
296 compared to 2.5% now) due to increasingly broad regional enrollment from centers of  
297 primary care which may have had a more meaningful impact on our current results.

298 Our findings also clarify the effect of hiPSI TTNtvs in individuals genetically  
299 similar to the AFR reference population. We previously identified no statistically  
300 significant effect among PMBB participants genetically similar to the AFR reference  
301 population.<sup>7</sup> This corroborated other evidence suggesting the possibility of differing  
302 effects across diverse populations.<sup>3</sup> Notably, our previous PMBB cohort included only  
303 2,123 participants genetically similar to the AFR reference population, 20 of whom  
304 carried a hiPSI TTNtv, representing a power of 55% to identify an OR of 3.3, suggesting  
305 we were previously underpowered to identify an effect similar to what we presently  
306 report. We now identify a significant effect of TTNtvs (OR = 3.5, 95% CI 1.5 to 8.2,  
307  $P=0.004$ ) in this population. Moreover, when we consider the extent of admixture that  
308 exists in this population, the dispersion of PMBB participants genetically similar to the

309 1000G AFR reference population across a range of GD from the 1000G European  
310 centroid, and the similar effect estimates across those distances, these findings are  
311 convincing that hiPSI TTNtvs confer increased DCM risk among individuals within these  
312 GD deciles corresponding to those previously labeled genetically similar to the 1000G  
313 AFR reference population.

314

### 315 **Limitations**

316 This work has some limitations. Reliance on electronic health records to establish  
317 a diagnosis of DCM may have misclassified a subset of individuals. Similarly, TTEs  
318 were not interpreted by a uniform reader. Our cohort is also largely composed of EUR  
319 and AFR individuals, limiting generalizability of the GD continuum concept to other  
320 genetically similar groups.

321

### 322 **Conclusion**

323 In summary, our updated analysis demonstrates a strong association between  
324 hiPSI TTNtvs and DCM across a range of genetic backgrounds, including subjects  
325 genetically similar to African reference population. These data suggest that  
326 recommendations for genetic testing and counseling should not differ between diverse  
327 populations.

328

### 329 **Acknowledgements, Conflicts of Interest and Disclosures**

330 We acknowledge the Penn Medicine BioBank (PMBB) for providing data and  
331 thank the patient-participants of Penn Medicine who consented to participate in this

332 research program. We would also like to thank the Penn Medicine BioBank team and  
333 Regeneron Genetics Center for providing genetic variant data for analysis. The PMBB is  
334 approved under IRB protocol# 813913 and supported by Perelman School of Medicine  
335 at University of Pennsylvania, a gift from the Smilow family, and the National Center for  
336 Advancing Translational Sciences of the National Institutes of Health under CTSA  
337 award number UL1TR001878.

338 M.G.L. receives research support to his institution from MyOme outside of this  
339 work. S.M.D receives research support to his institution from RenalytixAI and in kind  
340 support from Novo Nordisk, both outside of this work.

341

#### 342 **Sources of Funding**

343 J.D. is supported by the American Heart Association (23POST1011251). M.G.L.  
344 received support from the Institute for Translational Medicine and Therapeutics of the  
345 Perelman School of Medicine at the University of Pennsylvania, the NIH/NHLBI National  
346 Research Service Award postdoctoral fellowship (T32HL007843), the Measey  
347 Foundation, and the Doris Duke Foundation (2023-0224). Z.A. is supported by the  
348 NIH/NHLBI (R01-HL152446) and the Department of Defense (W81XWH18-1-0503).

349

350



351 **References**

- 352
- 353 1. Freiburg A, Trombitas K, Hell W, Cazorla O, Fougerousse F, Centner T,  
354 Kolmerer B, Witt C, Beckmann JS, Gregorio CC, et al. Series of exon-skipping  
355 events in the elastic spring region of titin as the structural basis for myofibrillar  
356 elastic diversity. *Circ Res*. 2000;86:1114-1121. doi: 10.1161/01.res.86.11.1114
- 357 2. Herman DS, Lam L, Taylor MR, Wang L, Teekakirikul P, Christodoulou D,  
358 Conner L, DePalma SR, McDonough B, Sparks E, et al. Truncations of titin  
359 causing dilated cardiomyopathy. *N Engl J Med*. 2012;366:619-628. doi:  
360 10.1056/NEJMoa1110186
- 361 3. Roberts AM, Ware JS, Herman DS, Schafer S, Baksi J, Bick AG, Buchan RJ,  
362 Walsh R, John S, Wilkinson S, et al. Integrated allelic, transcriptional, and  
363 phenomic dissection of the cardiac effects of titin truncations in health and  
364 disease. *Sci Transl Med*. 2015;7:270ra276. doi: 10.1126/scitranslmed.3010134
- 365 4. Akinrinade O, Alastalo TP, Koskenvuo JW. Relevance of truncating titin  
366 mutations in dilated cardiomyopathy. *Clin Genet*. 2016;90:49-54. doi:  
367 10.1111/cge.12741
- 368 5. Haas J, Frese KS, Peil B, Kloos W, Keller A, Nietsch R, Feng Z, Muller S,  
369 Kayvanpour E, Vogel B, et al. Atlas of the clinical genetics of human dilated  
370 cardiomyopathy. *Eur Heart J*. 2015;36:1123-1135a. doi:  
371 10.1093/eurheartj/ehu301
- 372 6. Akinrinade O, Ollila L, Vattulainen S, Tallila J, Gentile M, Salmenpera P, Koillinen  
373 H, Kaartinen M, Nieminen MS, Myllykangas S, et al. Genetics and genotype-

- 374 phenotype correlations in Finnish patients with dilated cardiomyopathy. *Eur Heart*  
375 *J.* 2015;36:2327-2337. doi: 10.1093/eurheartj/ehv253
- 376 7. Haggerty CM, Damrauer SM, Levin MG, Birtwell D, Carey DJ, Golden AM,  
377 Hartzel DN, Hu Y, Judy R, Kelly MA, et al. Genomics-First Evaluation of Heart  
378 Disease Associated With Titin-Truncating Variants. *Circulation.* 2019;140:42-54.  
379 doi: 10.1161/CIRCULATIONAHA.119.039573
- 380 8. McAfee Q, Chen CY, Yang Y, Caporizzo MA, Morley M, Babu A, Jeong S,  
381 Brandimarto J, Bedi KC, Jr., Flam E, et al. Truncated titin proteins in dilated  
382 cardiomyopathy. *Sci Transl Med.* 2021;13:eabd7287. doi:  
383 10.1126/scitranslmed.abd7287
- 384 9. McAfee Q, Caporizzo MA, Uchida K, Bedi KC, Jr., Margulies KB, Arany Z,  
385 Prosser BL. Truncated titin protein in dilated cardiomyopathy incorporates into  
386 the sarcomere and transmits force. *J Clin Invest.* 2023. doi: 10.1172/JCI170196
- 387 10. Jordan E, Kinnamon DD, Haas GJ, Hofmeyer M, Kransdorf E, Ewald GA, Morris  
388 AA, Owens A, Lowes B, Stoller D, et al. Genetic Architecture of Dilated  
389 Cardiomyopathy in Individuals of African and European Ancestry. *JAMA.*  
390 2023;330:432-441. doi: 10.1001/jama.2023.11970
- 391 11. Astore C, Sharma S, Nagpal S, Consortium NIG, Cutler DJ, Rioux JD, Cho JH,  
392 McGovern DPB, Brant SR, Kugathasan S, et al. The role of admixture in the rare  
393 variant contribution to inflammatory bowel disease. *Genome Med.* 2023;15:97.  
394 doi: 10.1186/s13073-023-01244-w
- 395 12. Lewis ACF, Molina SJ, Appelbaum PS, Dauda B, Di Rienzo A, Fuentes A,  
396 Fullerton SM, Garrison NA, Ghosh N, Hammonds EM, et al. Getting genetic

- 397 ancestry right for science and society. *Science*. 2022;376:250-252. doi:  
398 10.1126/science.abm7530
- 399 13. Busby GB, Kulm S, Bolli A, Kintzle J, Domenico PD, Botta G. Ancestry-specific  
400 polygenic risk scores are risk enhancers for clinical cardiovascular disease  
401 assessments. *Nat Commun*. 2023;14:7105. doi: 10.1038/s41467-023-42897-w
- 402 14. Ding Y, Hou K, Xu Z, Pimplaskar A, Petter E, Boulier K, Prive F, Vilhjalmsson BJ,  
403 Olde Loohuis LM, Pasaniuc B. Polygenic scoring accuracy varies across the  
404 genetic ancestry continuum. *Nature*. 2023;618:774-781. doi: 10.1038/s41586-  
405 023-06079-4
- 406 15. Ahlberg G, Refsgaard L, Lundegaard PR, Andreassen L, Ranthe MF, Linscheid N,  
407 Nielsen JB, Melbye M, Haunso S, Sajadieh A, et al. Rare truncating variants in  
408 the sarcomeric protein titin associate with familial and early-onset atrial  
409 fibrillation. *Nat Commun*. 2018;9:4316. doi: 10.1038/s41467-018-06618-y
- 410 16. Corden B, Jarman J, Whiffin N, Tayal U, Buchan R, Sehmi J, Harper A,  
411 Midwinter W, Lascelles K, Markides V, et al. Association of Titin-Truncating  
412 Genetic Variants With Life-threatening Cardiac Arrhythmias in Patients With  
413 Dilated Cardiomyopathy and Implanted Defibrillators. *JAMA Netw Open*.  
414 2019;2:e196520. doi: 10.1001/jamanetworkopen.2019.6520
- 415 17. Akhtar MM, Lorenzini M, Cicerchia M, Ochoa JP, Hey TM, Sabater Molina M,  
416 Restrepo-Cordoba MA, Dal Ferro M, Stolfo D, Johnson R, et al. Clinical  
417 Phenotypes and Prognosis of Dilated Cardiomyopathy Caused by Truncating  
418 Variants in the TTN Gene. *Circ Heart Fail*. 2020;13:e006832. doi:  
419 10.1161/CIRCHEARTFAILURE.119.006832

- 420 18. Dewey FE, Gusarova V, O'Dushlaine C, Gottesman O, Trejos J, Hunt C, Van  
421 Hout CV, Habegger L, Buckler D, Lai KM, et al. Inactivating Variants in  
422 ANGPTL4 and Risk of Coronary Artery Disease. *N Engl J Med*. 2016;374:1123-  
423 1133. doi: 10.1056/NEJMoa1510926
- 424 19. Verma A, Damrauer SM, Naseer N, Weaver J, Kripke CM, Guare L, Sirugo G,  
425 Kember RL, Drivas TG, Dudek SM, et al. The Penn Medicine BioBank: Towards  
426 a Genomics-Enabled Learning Healthcare System to Accelerate Precision  
427 Medicine in a Diverse Population. *J Pers Med*. 2022;12. doi:  
428 10.3390/jpm12121974
- 429 20. Wang K, Li M, Hakonarson H. ANNOVAR: functional annotation of genetic  
430 variants from high-throughput sequencing data. *Nucleic Acids Res*.  
431 2010;38:e164. doi: 10.1093/nar/gkq603
- 432 21. Fairley S, Lowy-Gallego E, Perry E, Flicek P. The International Genome Sample  
433 Resource (IGSR) collection of open human genomic variation resources. *Nucleic*  
434 *Acids Res*. 2020;48:D941-D947. doi: 10.1093/nar/gkz836
- 435 22. Mathias RA, Taub MA, Gignoux CR, Fu W, Musharoff S, O'Connor TD, Vergara  
436 C, Torgerson DG, Pino-Yanes M, Shringarpure SS, et al. A continuum of  
437 admixture in the Western Hemisphere revealed by the African Diaspora genome.  
438 *Nat Commun*. 2016;7:12522. doi: 10.1038/ncomms12522
- 439 23. Tishkoff SA, Reed FA, Friedlaender FR, Ehret C, Ranciaro A, Froment A, Hirbo  
440 JB, Awomoyi AA, Bodo JM, Doumbo O, et al. The genetic structure and history of  
441 Africans and African Americans. *Science*. 2009;324:1035-1044. doi:  
442 10.1126/science.1172257

- 443 24. Gouveia MH, Borda V, Leal TP, Moreira RG, Bergen AW, Kehdy FSG, Alvim I,  
444 Aquino MM, Araujo GS, Araujo NM, et al. Origins, Admixture Dynamics, and  
445 Homogenization of the African Gene Pool in the Americas. *Mol Biol Evol.*  
446 2020;37:1647-1656. doi: 10.1093/molbev/msaa033
- 447 25. Lohmueller KE, Pearce CL, Pike M, Lander ES, Hirschhorn JN. Meta-analysis of  
448 genetic association studies supports a contribution of common variants to  
449 susceptibility to common disease. *Nat Genet.* 2003;33:177-182. doi:  
450 10.1038/ng1071
- 451
- 452

453 **Tables and Figure Legends**

454 **Table 1: Clinical characteristics of individuals in the Penn Medicine Biobank with**  
 455 **and without high percentage spliced-in *TTN* truncating variants.**

| <b>Demographic</b>                 | <b>hiPSI <i>TTN</i>tv<br/>(436)</b> | <b>non-hiPSI <i>TTN</i>tv<br/>(43,295)</b> | <b>P-value<br/>Difference</b> |
|------------------------------------|-------------------------------------|--------------------------------------------|-------------------------------|
| Age, median (IQR)                  | 56 (45-67)                          | 57 (45-69)                                 | 0.65                          |
| Female Sex, N (%)                  | 184 (42%)                           | 21,723 (50%)                               | <0.001                        |
| "Genetically Similar" Group, N (%) |                                     |                                            |                               |
| EUR                                | 330 (75%)                           | 29,626 (68%)                               | 0.002                         |
| AFR                                | 88 (20%)                            | 11,048 (26%)                               | 0.008                         |
| AMR                                | 2 (0.4%)                            | 564 (1.3%)                                 | 0.12                          |
| EAS                                | 4 (0.9%)                            | 466 (1.1%)                                 | 0.74                          |
| SAS                                | 5 (1.1%)                            | 554 (1.3%)                                 | 0.79                          |
| Unknown                            | 7 (1.6%)                            | 1,037 (2.4%)                               | 0.28                          |
| Dilated Cardiomyopathy, N (%)      | 52 (12%)                            | 1,060 (2.4%)                               | <0.001                        |
| Ischemic Cardiomyopathy, N (%)     | 64 (15%)                            | 5,305 (12%)                                | 0.13                          |
| Atrial Fibrillation, N (%)         | 89 (20%)                            | 4,831 (11%)                                | <0.001                        |

456

457

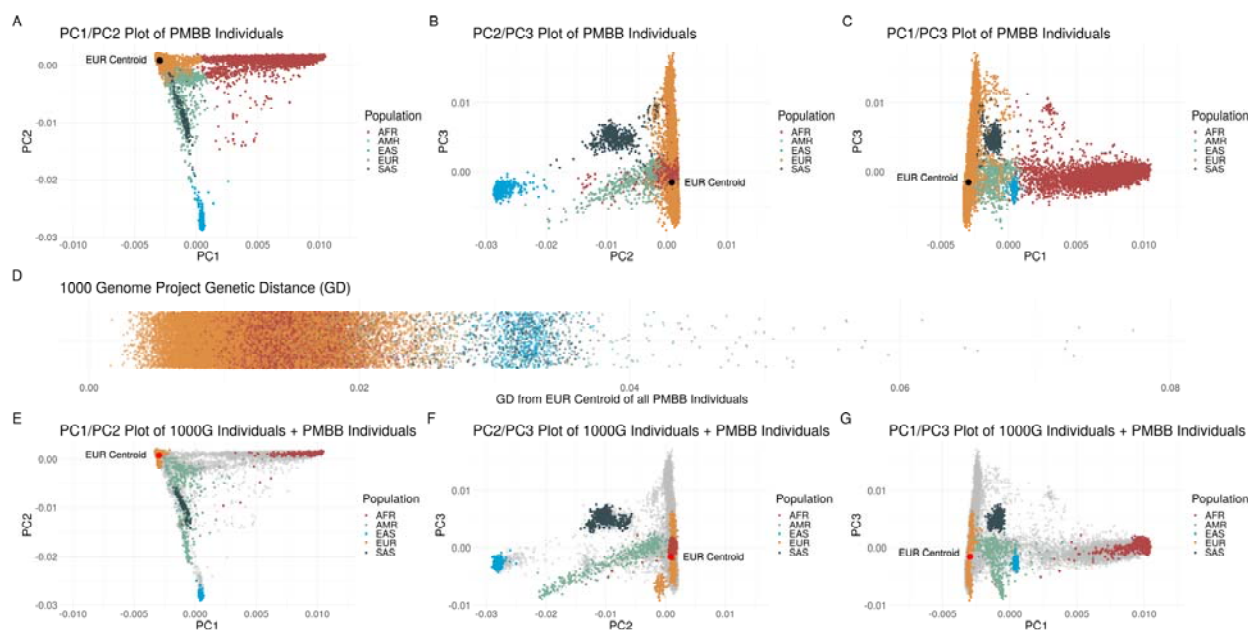

458

459 **Figure 1: Principal component based clusters of individuals in the Penn Medicine**  
460 **Biobank compared to genetic distance from the 1000 Genomes Project European**  
461 **centroid and compared to continental-level clusters of 1000 Genomes Project**  
462 **individuals demonstrating the degree of overlap of different genetically similar**  
463 **groups. A-C:** Discrete labelling of the position of each individual within the Penn  
464 Medicine Biobank (PMBB) colored by genetically similar group based on 1000  
465 Genomes Project (1000G) continental-level reference populations in a plot of (A)  
466 principal component (PC) 1 versus PC2, (B) PC2 versus PC3, and (C) PC1 versus PC3  
467 with 1000G European centroid (black dot) identified in each plot. (D) the genetic  
468 distance from the 1000G European centroid of each individual within PMBB again  
469 colored by genetically similar group based on 1000 Genomes Project (1000G)  
470 continental-level reference populations. **E-G:** Discrete labelling of the position of each  
471 1000G reference panel individuals colored by continental region with PMBB individuals

472 represented by grey dots in a plot of **(E)** PC1 versus PC2, **(F)** PC2 versus PC3, and **(G)**

473 PC1 versus PC3 with 1000G European centroid (red dot) identified in each plot.

474



**A) Effect of TTNts on Risk of DCM**

| Decile Cohort                             | OR (95% CI)        | P-value |
|-------------------------------------------|--------------------|---------|
| Decile 1 (Closest to EUR Centroid)        | 5.82 [2.42; 14.01] | < .001  |
| Decile 2                                  | 4.70 [1.62; 13.60] | .004    |
| Decile 3                                  | 7.69 [3.11; 19.01] | < .001  |
| Decile 4                                  | 3.41 [1.32; 8.79]  | .01     |
| Decile 5                                  | 4.14 [1.43; 11.99] | .009    |
| Decile 6                                  | 3.29 [1.26; 8.56]  | .01     |
| Decile 7                                  | 6.34 [2.88; 13.95] | < .001  |
| Decile 8                                  | 4.50 [1.34; 15.16] | .02     |
| Decile 9                                  | 5.97 [2.28; 15.59] | < .001  |
| Decile 10 (Furthest from to EUR Centroid) | 9.39 [3.82; 23.13] | < .001  |
| Meta-analysis                             | 5.42 [4.01; 7.32]  | < .001  |

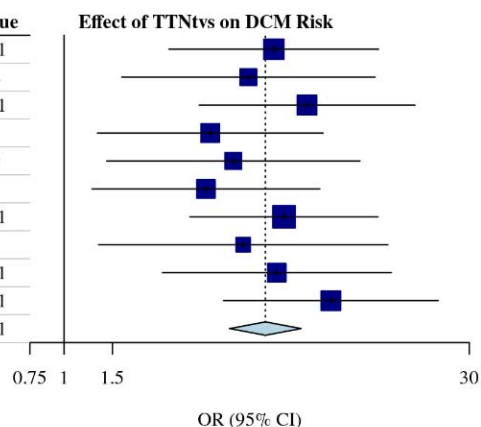

Heterogeneity:  $\chi^2 = 4.59$  ( $P = .87$ ),  $I^2 = 0\%$

**B) Effect of TTNts on Minimum LVEF**

| Decile Population                      | Beta (95% CI)          | P-value |
|----------------------------------------|------------------------|---------|
| Decile 1 (Closest to EUR Centroid)     | -10.92 [-17.45; -4.38] | .001    |
| Decile 2                               | -8.22 [-16.50; 0.07]   | .05     |
| Decile 3                               | 0.89 [-6.80; 8.59]     | .82     |
| Decile 4                               | -7.62 [-15.10; -0.15]  | .05     |
| Decile 5                               | -18.74 [-27.48; -9.99] | < .001  |
| Decile 6                               | -8.13 [-15.40; -0.86]  | .03     |
| Decile 7                               | -12.74 [-19.53; -5.94] | < .001  |
| Decile 8                               | -11.83 [-21.88; -1.77] | .02     |
| Decile 9                               | -15.20 [-21.98; -8.42] | < .001  |
| Decile 10 (Furthest from EUR Centroid) | -9.29 [-16.03; -2.55]  | .007    |
| Meta-analysis                          | -10.11 [-13.22; -7.01] | < .001  |

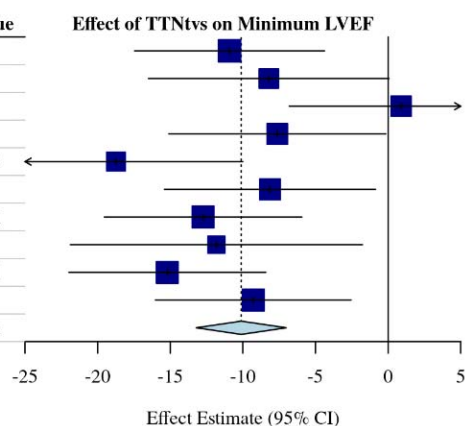

Heterogeneity:  $\chi^2 = 15.48$  ( $P = .08$ ),  $I^2 = 42\%$

475

476 **Figure 2: Effect of TTN truncating variants on risk of dilated cardiomyopathy and**  
 477 **on minimum left ventricular ejection fraction, stratified by genetic distance from**  
 478 **the 1000 Genomes Project European centroid. (A)** Logistic regression analysis of the  
 479 association between hiPSI TTNts on risk of DCM stratified by genetic distance (GD)  
 480 from the 1000 Genomes Project (1000G) European centroid. **(B)** Linear regression  
 481 analysis of the association between hiPSI TTNts and minimum left ventricular ejection  
 482 fraction stratified by GD from the 1000G European centroid. OR = odds ratio; CI =  
 483 confidence interval; EUR = European; LVEF = left ventricular ejection fraction.

**A) Effect of TTNtvs on Risk of DCM Dichotomized by Genetically Similar Group**

| Population    | OR (95% CI)        | P-value |
|---------------|--------------------|---------|
| EUR           | 7.55 [4.99; 11.42] | < .001  |
| AFR           | 3.50 [1.48; 8.24]  | .004    |
| Meta-analysis | 5.65 [2.72; 11.74] | < .001  |

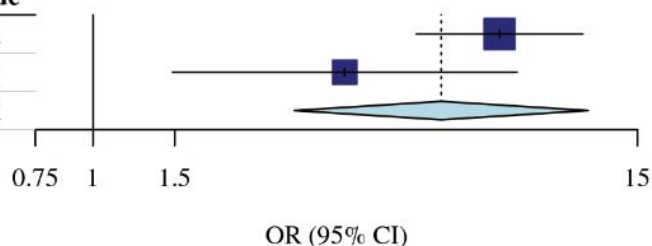

Heterogeneity:  $\chi^2_1 = 2.52$  ( $P = .11$ ),  $I^2 = 60\%$

**B) Effect of TTNtvs on Minimum LVEF Dichotomized by Genetically Similar Group**

| Population    | Beta (95% CI)           | P-value |
|---------------|-------------------------|---------|
| AFR           | -16.28 [-21.88; -10.68] | < .001  |
| EUR           | -9.68 [-12.18; -7.18]   | < .001  |
| Meta-analysis | -12.48 [-18.88; -6.09]  | < .001  |

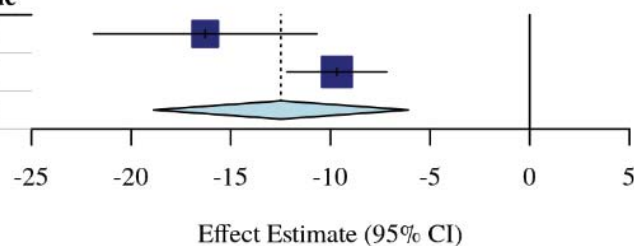

Heterogeneity:  $\chi^2_1 = 4.45$  ( $P = .03$ ),  $I^2 = 78\%$

484

485

486

487

488

489

490

491

492

493

494

495

**Figure 3: Effect of high percentage spliced in *TTN* truncating variant on risk of dilated cardiomyopathy diagnosis and minimum left ventricular ejection fraction reduction stratified by genetically similar group excluding those with ischemic cardiomyopathy in the Penn Medicine Biobank. (A) Logistic regression analysis of the association between hiPSI TTNtvs and DCM diagnosis, and (B) linear regression analysis of the association between hiPSI TTNtvs and minimum left ventricular ejection fraction among individuals genetically similar to the 1000 Genomes Project European and African reference population, and meta-analyzed. OR = odds ratio; CI = confidence interval; EUR = individuals genetically similar to the European reference population; AFR = individuals genetically similar to the African reference population.**
