# Supplementary material for: Titin-Truncating variants Predispose to Dilated Cardiomyopathy in Diverse Populations
Source: bioRxiv or medRxiv preprint supplement (doi:10.1101/2024.01.17.24301405), 2024-01-17
Supplement: Supplementary file [file media-1.pdf]

1 **DATA SUPPLEMENT: Titin-Truncating variants Predispose to Dilated**  
2 **Cardiomyopathy in Diverse Populations**

3  
4  
5 **Authors:** John DePaolo, MD, PhD,<sup>1</sup> Marc Bornstein, AB,<sup>2</sup> Renae Judy, MS,<sup>1</sup> Sarah  
6 Abramowitz, BA,<sup>1</sup> Shefali S. Verma, PhD,<sup>3</sup> Michael G. Levin, MD,<sup>2,4</sup> Zoltan Arany, MD,  
7 PhD,<sup>2\*</sup> Scott M. Damrauer, MD,<sup>1,2,4,5\*</sup>

8  
9 **Affiliations:**

10 <sup>1</sup> Department of Surgery, Perelman School of Medicine, University of Pennsylvania,  
11 Philadelphia, PA 19104, USA.

12 <sup>2</sup> Cardiovascular Institute, Department of Medicine, Perelman School of Medicine,  
13 University of Pennsylvania, PA 19104, USA.

14 <sup>3</sup> Department of Pathology and Laboratory Medicine, Perelman School of Medicine,  
15 University of Pennsylvania, PA 19104, USA.

16 <sup>4</sup> Corporal Michael J. Crescenz VA Medical Center, Philadelphia, PA 19104, USA.

17 <sup>5</sup> Department of Genetics, Perelman School of Medicine, University of Pennsylvania,  
18 Philadelphia, PA 19104, USA.

19 \* Jointly supervised this work  
20  
21  
22  
23

24 **Address for correspondence:**

25 Scott Damrauer, MD

26 Perelman School of Medicine

27 Division of Vascular Surgery

28 Hospital of the University of Pennsylvania

29 3400 Spruce Street, 14th Floor South Perelman Center

30 Philadelphia, PA 19104

31 Office: 215-615-1698

32 scott.damrauer@penmedicine.upenn.edu  
33  
34

35 **Tables and Figure Legends**

36 **Supplemental Table 1: Number of Individuals Genetically Similar to a 1000**  
 37 **Genomes Project Reference Population in Each Decile of Genetic Distance from**  
 38 **the European Centroid.**

| <b>GD Decile from European Centroid</b> | <b>EUR</b> | <b>AFR</b> | <b>AMR</b> | <b>SAS</b> | <b>EAS</b> |
|-----------------------------------------|------------|------------|------------|------------|------------|
| 1                                       | 4226       | 42         | 1          | 0          | 0          |
| 2                                       | 4134       | 133        | 2          | 0          | 0          |
| 3                                       | 3814       | 447        | 8          | 0          | 0          |
| 4                                       | 3246       | 1013       | 10         | 0          | 0          |
| 5                                       | 2579       | 1679       | 10         | 1          | 0          |
| 6                                       | 2172       | 2085       | 10         | 2          | 0          |
| 7                                       | 2110       | 2134       | 21         | 4          | 0          |
| 8                                       | 2476       | 1734       | 49         | 9          | 0          |
| 9                                       | 2948       | 1205       | 95         | 20         | 0          |
| 10                                      | 2251       | 664        | 360        | 523        | 470        |

39  
 40 GD = Genetic Distance; EUR = 1000 Genomes Project European Reference  
 41 Population; AFR = 1000 Genomes Project African Reference Population; AMR = 1000  
 42 Genomes Project Ad Mixed American Reference Population; SAS = 1000 Genomes  
 43 Project South Asian Reference Population; EAS = 1000 Genomes Project East Asian  
 44 Reference Population.

45

46 **Supplemental Table 2: Effect of hiPSI *TTN* truncating variants, genetic distance**  
 47 **from 1000 Genomes Project European centroid, and the interaction between**  
 48 **genetic distance and hiPSI *TTN* truncating variants on risk of dilated**  
 49 **cardiomyopathy.**

| Regression Variable    | Odds Ratio of DCM     | 95% Confidence Interval                        | P-value |
|------------------------|-----------------------|------------------------------------------------|---------|
| hiPSI <i>TTN</i> tv    | 5.63                  | 4.16 to 7.61                                   | <0.001  |
| GD                     | $7.84 \times 10^{-8}$ | $1.63 \times 10^{-16}$ to 23.30                | 0.10    |
| hiPSI <i>TTN</i> tv*GD | $1.84 \times 10^{24}$ | $4.09 \times 10^{-9}$ to $8.27 \times 10^{56}$ | 0.15    |

50

51 hiPSI = high percentage spliced in; DCM = Dilated cardiomyopathy; GD = Genetic

52 Distance from the 1000 Genomes Project European Centroid.

53

54

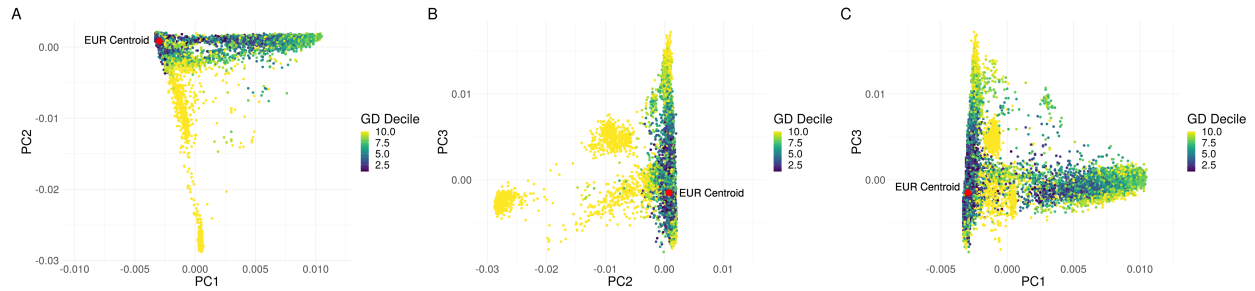

55

56 **Supplemental Figure 1: Principal component based clusters of individuals in the**  
 57 **Penn Medicine Biobank compared to genetic distance from the 1000 Genomes**  
 58 **Project European centroid.** Discrete labelling of the position of each individual within  
 59 PMBB colored by decile of genetic distance from the 1000 Genomes Project (1000G)  
 60 European centroid in a plot of **(A)** principal component (PC) 1 versus PC2, **(B)** PC2  
 61 versus PC3, and **(C)** PC1 versus PC3 with 1000G European centroid (red dot) identified  
 62 in each plot demonstrating the overlap between individuals genetically close or distant  
 63 from the 1000G European centroid based on PC space.

**A) Effect of TTNtvs on Risk of DCM Dichotomized by Genetically Similar Group**

| Population    | OR (95% CI)       | P-value |
|---------------|-------------------|---------|
| EUR           | 6.16 [4.34; 8.74] | < .001  |
| AFR           | 4.56 [2.52; 8.25] | < .001  |
| Meta-analysis | 5.70 [4.22; 7.70] | < .001  |

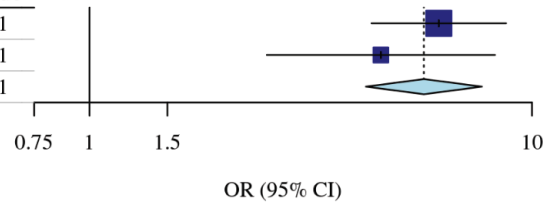

Heterogeneity:  $\chi^2 = 0.74$  ( $P = .39$ ),  $I^2 = 0\%$

**B) Effect of TTNtvs on Minimum LVEF Dichotomized by Genetically Similar Group**

| Population    | Beta (95% CI)          | P-value |
|---------------|------------------------|---------|
| AFR           | -12.59 [-18.06; -7.12] | < .001  |
| EUR           | -10.12 [-12.76; -7.48] | < .001  |
| Meta-analysis | -10.59 [-12.96; -8.21] | < .001  |

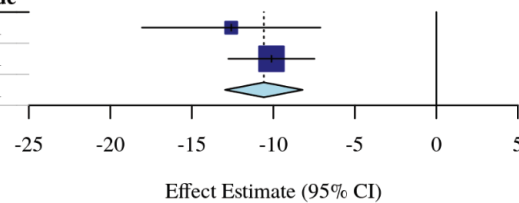

Heterogeneity:  $\chi^2 = 0.63$  ( $P = .43$ ),  $I^2 = 0\%$

64

65 **Supplemental Figure 2: Effect of high percentage spliced in titin truncating**  
 66 **variant on risk of dilated cardiomyopathy diagnosis and minimum left ventricular**  
 67 **ejection fraction reduction stratified by genetically similar group without**  
 68 **excluding those with ischemic cardiomyopathy in the Penn Medicine Biobank. (A)**

69 Logistic regression analysis of the association between hiPSI TTNtvs and DCM  
 70 diagnosis, and (B) linear regression analysis of the association between hiPSI TTNtvs  
 71 and minimum left ventricular ejection fraction among individuals genetically similar to  
 72 the 1000 Genomes Project European and African reference population, and meta-  
 73 analyzed. OR = odds ratio; CI = confidence interval; EUR = individuals genetically  
 74 similar to the European reference population; AFR = individuals genetically similar to the  
 75 African reference population.

### A) Effect of TTNtvs on Atrial Fibrillation Risk

| Decile Cohort                             | OR (95% CI)       | P-value |
|-------------------------------------------|-------------------|---------|
| Decile 1 (Closest to EUR Centroid)        | 2.68 [1.40; 5.16] | .003    |
| Decile 2                                  | 1.31 [0.53; 3.23] | .55     |
| Decile 3                                  | 2.17 [1.03; 4.59] | .04     |
| Decile 4                                  | 0.60 [0.21; 1.71] | .34     |
| Decile 5                                  | 0.98 [0.34; 2.84] | .96     |
| Decile 6                                  | 2.68 [1.27; 5.65] | .010    |
| Decile 7                                  | 2.96 [1.40; 6.25] | .005    |
| Decile 8                                  | 2.72 [1.06; 6.98] | .04     |
| Decile 9                                  | 2.86 [1.37; 5.97] | .005    |
| Decile 10 (Furthest from to EUR Centroid) | 4.36 [2.21; 8.61] | < .001  |
| Meta-analysis                             | 2.25 [1.64; 3.08] | < .001  |

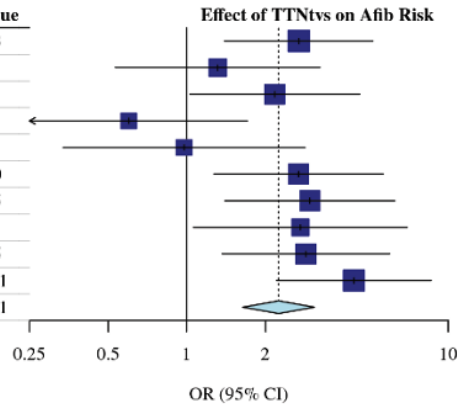

Heterogeneity:  $\chi^2_9 = 14.96$  ( $P = .09$ ),  $I^2 = 40\%$

### B) Effect of TTNtvs on Atrial Fibrillation Risk Dichotomized by Genetically Similar Group

| Population    | OR (95% CI)       | P-value |
|---------------|-------------------|---------|
| EUR           | 2.11 [1.62; 2.77] | < .001  |
| AFR           | 1.98 [1.02; 3.85] | .04     |
| Meta-analysis | 2.10 [1.63; 2.69] | < .001  |

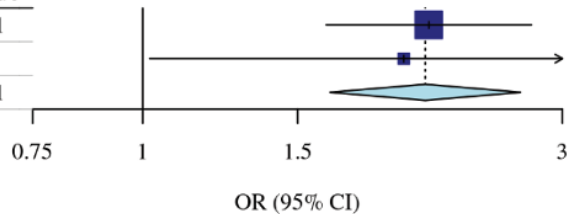

Heterogeneity:  $\chi^2_1 = 0.03$  ( $P = .86$ ),  $I^2 = 0\%$

76

77 **Supplemental Figure 3: Effect of high percentage spliced in titin truncating**

78 **variant on risk of atrial fibrillation diagnosis in the Penn Medicine Biobank. (A)**

79 Logistic regression analysis of the association between hiPSI TTNtvs and Afib by

80 deciles of genetic distance from the 1000 Genomes Project European centroid; and **(B)**

81 logistic regression analysis of the association between hiPSI TTNtvs and Afib by

82 genetically similar group. OR = odds ratio; CI = confidence interval; EUR = individuals

83 genetically similar to the European reference population; AFR = individuals genetically

84 similar to the African reference population.

85
